# Supplementary material for: Prevalence and Cardiovascular Health Impact of Family History of Premature Heart Disease in the United States: Analysis of the National Health and Nutrition Examination Survey, 2007–2014
Source: PubMed Central journal article supplement — J Am Heart Assoc. 2019 Jul 13;8(14):e012364. doi: 10.1161/JAHA.119.012364 (PMC6662130; doi:10.1161/jaha.119.012364), 2019-07-13
Supplement: JAH3-8-e012364-s001.pdf [file JAH3-8-e012364-s001.pdf]

# **SUPPLEMENTAL MATERIAL**

**Table S1. Estimates of adjusted odds ratios (aOR) from the logistic regression analysis of factors related to diagnosed heart attack or angina.**

|                                                 | aOR (95% CI)        |
|-------------------------------------------------|---------------------|
| <b>Self-reported family history<sup>†</sup></b> |                     |
| Age 20-39 (FHPHD: Yes vs No <sup>†</sup> )      | 10.25 (4.76, 22.05) |
| Age 40-59 (FHPHD: Yes vs No <sup>†</sup> )      | 2.95 (2.06, 4.21)   |
| Age ≥60 (FHPHD: Yes vs No <sup>†</sup> )        | 1.91 (1.45, 2.52)   |
| <b>Sex</b>                                      |                     |
| Females <sup>†</sup>                            |                     |
| Males                                           | 1.95 (1.60, 2.37)   |
| <b>Race/ Ethnicity</b>                          |                     |
| Non-Hispanic white <sup>†</sup>                 |                     |
| Hispanic                                        | 0.71 (0.57, 0.90)   |
| Non-Hispanic black                              | 0.85 (0.68, 1.06)   |
| Other*                                          | 0.85 (0.57, 1.29)   |
| <b>BMI (kg/m<sup>2</sup>)</b>                   |                     |
| < 25 <sup>†</sup>                               |                     |
| 25-29.9                                         | 1.06 (0.82, 1.37)   |
| ≥ 30                                            | 1.71 (1.40, 2.08)   |
| <b>Income to poverty ratio<sup>§</sup></b>      |                     |
| ≥ 1 <sup>†</sup>                                |                     |
| < 1                                             | 1.77 (1.39, 2.24)   |
| <b>Education</b>                                |                     |
| ≥ high school completion <sup>†</sup>           |                     |
| < high school completion                        | 1.19 (0.99, 1.41)   |
| <b>Physical activity</b>                        |                     |
| Active <sup>†  </sup>                           |                     |
| Not active                                      | 1.63 (1.32, 2.03)   |
| <b>Current smoker</b>                           |                     |
| No <sup>†</sup>                                 |                     |
| Yes                                             | 1.62 (1.28, 2.07)   |

CI = Confidence Interval; NHANES = National Health and Nutrition Examination Survey; BMI = Body mass index

\*Non-Hispanic Asians, non-Hispanic multiracial, and non-Hispanic other race.

<sup>†</sup>Reference group.

<sup>‡</sup>Since the interaction of FHPHD and age was significant, aOR of family history for each age group was presented.

<sup>§</sup>A ratio of family income to poverty guidelines.

<sup>||</sup>≥150 min/week moderate activity or ≥75 min/week vigorous activity or ≥150 min/week moderate + vigorous activity.

**Table S2. Distribution of Ideal, Intermediate and Poor<sup>‡</sup> Cardiovascular Health for Each Metric for Adults 20 years and older free of angina or heart attack, NHANES 2007-2014.**

| <b>Cardiovascular health metric</b>                     | <b>Overall</b> | <b>No Family history of CVD</b> | <b>Family history of CVD</b> |
|---------------------------------------------------------|----------------|---------------------------------|------------------------------|
| <b>Body mass index risk (% , se)</b>                    |                |                                 |                              |
| Ideal<br>( < 25 kg/m <sup>2</sup> )                     | 30.1 (0.66)    | 30.6 (0.68)                     | 26.1* (1.26)                 |
| Intermediate<br>(25-29 kg/m <sup>2</sup> )              | 34.2 (0.66)    | 34.3 (0.69)                     | 33.3 (1.37)                  |
| Poor<br>( ≥ 30 kg/m <sup>2</sup> )                      | 35.5 (0.59)    | 35.1 (0.65)                     | 40.6* (1.14)                 |
| <b>Smoking risk (% , se)</b>                            |                |                                 |                              |
| Ideal<br>(Never smoked or quit smoking ≥ 12 months ago) | 77.7 (0.62)    | 78.6 (0.60)                     | 70.9* (1.79)                 |
| Intermediate<br>(Quit smoking < 12 months ago)          | 2.0 (0.18)     | 2.1 (0.19)                      | 1.9 (0.40)                   |
| Poor<br>(Current smoker)                                | 20.3 (0.59)    | 19.3 (0.55)                     | 27.2* (1.77)                 |
| <b>Physical activity risk (% , se)</b>                  |                |                                 |                              |

|                                                                                           |             |             |              |
|-------------------------------------------------------------------------------------------|-------------|-------------|--------------|
| Ideal                                                                                     | 47.1 (0.94) | 47.8 (0.92) | 41.8* (1.77) |
| (≥150 min/week moderate or ≥75 min/week vigorous or ≥150 min/week moderate + vigorous)    |             |             |              |
| Intermediate                                                                              | 18.0 (0.51) | 17.8 (0.54) | 19.5 (1.24)  |
| (1-149 min/week moderate or 1-74 min/week vigorous or 1-149 min/week moderate + vigorous) |             |             |              |
| Poor                                                                                      | 34.9 (0.95) | 34.4 (0.93) | 38.6* (1.74) |
| (None)                                                                                    |             |             |              |
| <b>Diet risk (% , se)</b>                                                                 |             |             |              |
| Ideal                                                                                     | 2.4 (0.18)  | 2.4 (0.19)  | 2.5 (0.51)   |
| (Healthy eating index score ≥ 81)                                                         |             |             |              |
| Intermediate                                                                              | 48.6 (0.92) | 49.1 (0.96) | 44.8* (1.78) |
| (Healthy eating index score 51-80)                                                        |             |             |              |
| Poor                                                                                      | 48.9 (0.98) | 48.4 (0.99) | 52.7* (1.92) |
| (Healthy eating index score ≤ 50)                                                         |             |             |              |
| <b>Cholesterol risk (% , se)</b>                                                          |             |             |              |
| Ideal                                                                                     | 45.7 (0.79) | 46.4 (0.80) | 40.2* (1.74) |
| (<200 mg/dL)                                                                              |             |             |              |
| Intermediate                                                                              | 40.5 (0.72) | 39.8 (0.72) | 45.8* (1.64) |
| (200-239 mg/dL or treated to goal)                                                        |             |             |              |
| Poor                                                                                      | 13.8 (0.45) | 13.8 (0.46) | 14.1 (1.13)  |

( $\geq 240$  mg/dL)

**Blood pressure risk (% , se)**

Ideal 42.7 (0.80) 43.8 (0.81) 34.1\* (1.50)

(SBP < 120/ DBP < 80 mmHg\*\*)

Intermediate 42.8 (0.71) 41.9 (0.70) 49.0\* (1.51)

(SBP 120-139 or DBP 80-89 mmHg or treated to goal)

Poor 14.6 (0.46) 14.3 (0.42) 16.9\* (1.39)

(SBP  $\geq 140$  or DBP  $\geq 90$  mm Hg)

**Diabetes risk (% , se)**

Ideal 72.7 (0.46) 73.6 (0.48) 66.3\* (1.40)

(Glucose <100 mg/dL and A1c < 5.7%)

Intermediate 20.0 (0.38) 19.4 (0.41) 24.6\* (1.11)

(Glucose 100-125 mg/dL or  $5.7\% \leq A1c < 6.5\%$  or treated to goal)

Poor 7.3 (0.24) 7.0 (0.24) 9.1\* (0.86)

(Diagnosed diabetes or glucose  $\geq 126$  mg/dL or A1c  $\geq 6.5\%$ )

**Mean score (se) of 7 health metrics<sup>†</sup>** 8.4 (0.05) 8.5 (0.05) 7.8\* (0.1)

**Categories of 7 health metrics<sup>†</sup>(% , se)**

Inadequate (0-4) 5.6 (0.24) 5.3 (0.27) 8.1\* (0.81)

Average (5-9) 59.2 (1.01) 58.1 (1.03) 67.1\* (1.69)

|                 |             |             |              |
|-----------------|-------------|-------------|--------------|
| Optimum (10-14) | 35.1 (1.01) | 36.6 (1.00) | 24.8* (1.76) |
|-----------------|-------------|-------------|--------------|

*\* Difference in percentage between populations with and without family history is significant at 0.05 level*

†A score of 0, 1, or 2, was assigned to each cardiovascular health metric to represent poor, intermediate, or ideal health. The overall score for the 7 health metrics ranged from 0 to 14.

‡Lloyd-Jones DM, Hong Y, Labarthe D, Mozaffarian D, Appel LJ, Van Horn L, Greenlund K, Daniels S. et al. Defining and setting national goals for cardiovascular health promotion and disease reduction: the American Heart Association's strategic Impact Goal through 2020 and beyond. *Circulation*. 2010;121:586-613.

se = standard error; NHANES = National Health and Nutrition Examination Survey.
